# Supplementary material for: The first application of a numerically-exact, higher-order sensitivity analysis approach for atmospheric modelling: implementation of the hyperdual-step method in the Community Multiscale Air Quality Model (CMAQ) version 5.3.2
Source: Copernicus journal article supplement (doi:10.5194/egusphere-2023-1017), 2023-06-30
Supplement: Supplementary file [file egusphere-2023-1017-AC4-supplement.pdf]

## Response to RC3

Jiachen Liu<sup>1</sup>, Eric Chen<sup>1</sup>, Shannon L. Capps<sup>1</sup>

<sup>1</sup>Department of Civil, Architectural & Environmental Engineering, Drexel University, Philadelphia, Pennsylvania, USA

Correspondence to: Shannon L. Capps ([shannon.capps@drexel.edu](mailto:shannon.capps@drexel.edu))

*For the convenience of the reviewer, we have included the comments from Reviewer 3 in black, normal font style and our responses indented in green, normal font style. The changes made to the manuscript or supplemental information corresponding to our response are provided in green, bold style font with the context of line numbers from the original manuscript and the original, remaining text in the normal font style.*

### II. Comments to the model source code:

1. The source files of the HDMMod and HDMMod\_cplx do not contain license, authors, and reference to original author of the C++ module which it is based on. Please, fill it in.

- Thank you for pointing out the lack of detailed documentation of license, authors, and reference to the original author of the C++ module. We have updated the HDMMod and HDMMod\_cplx files to include the license, authors, and reference to the original C++ module.

Lines 513-514:

The CMAQ-hyd model is archived at <https://doi.org/10.5281/zenodo.10119026> (Liu et al., 2023).

2. The changes in the source code contain almost no comments. It would be beneficial to denote and comment your adaptations as it could help users to quickly orient in your changes and it also would be of use during adaptation of the CMAQ-hyd to the new versions of the CMAQ model. I do not insist on doing it before the publication of this paper but I consider beneficial to do it as soon as possible.

- Thank you for your suggestion about adding comments to the source code. Since we submitted the paper, we have made several updates to the source code and plan to add comments to our adaptations in the near future.

### References

Liu, J. C., Eric, Capps, Shannon: CMAQv5.3.2-hyd (5.3.2-hyd1.0.1), Zenodo [code], 10.5281/zenodo.10119026, 2023.
